# Supplementary material
Source: publisher figshare collection journal article supplement (https://sage.figshare.com/ndownloader/files/20032376)
Supplement: Supplementary file 1 [file 20032376]

Non-intrusive reduced order modeling for fluid problems: A brief review

Jian Yu<sup>1</sup>, Chao Yan<sup>1</sup> and Mengwu Guo<sup>2</sup>

1 School of Aeronautic Science and Engineering, Beihang University, Beijing 100191, China

2 Chair of Computational Mathematics and Simulation Science, Ecole Polytechnique Federale de Lausanne, Lausanne CH-1015, Switzerland

Corresponding author: Chao Yan. [yanchao@buaa.edu.cn](mailto:yanchao@buaa.edu.cn)

Acknowledgement and funding information:

The authors would like to acknowledge Mr. Fanzhi Zeng at Beihang University for technical discussions and Mr. Libin Ma at Beihang University for illustration editing.

This work was supported by the National Natural Science Foundation of China (grant number 11972064 and grant number 11721202).
